# Supplementary material for: An Application of Stochastic Programming in Solving Capacity Allocation and Migration Planning Problem under Uncertainty
Source: Hindawi journal article supplement (doi:10.1155/2015/741329), 2015-01-01
Supplement: f1 [file 741329.f1.pdf]

## Appendix A: Mathematical programming model for capacity planning problem under demand certainty

### 1. Indices

- $c$  = customer ( $c = 1, 2, \dots, C$ ).  
 $i$  = product type ( $i = 1, 2, \dots, I$ ).  
 $l$  = production line ( $l = 1, 2, \dots, L$ ).  
 $s$  = production stage ( $s = 1, 2, \dots, S$ ).  
 $j$  = resource configuration ( $j = 1, 2, \dots, J$ ).  
 $m$  = material type ( $m = 1, 2, \dots, M$ ).  
 $k$  = machine type ( $k = 1, 2, \dots, K$ ).  
 $n$  = tool type ( $n = 1, 2, \dots, N$ ).  
 $t$  = time period ( $t = 1, 2, \dots, T$ ).

### 2. Parameters

- $de_{ict}$  = the demand quantity of customer  $c$  for product  $i$  in time  $t$ .  
 $pr_{ict}$  = sales price of customer  $c$  for product  $i$  in time  $t$ .  
 $kl_{lsk}$  = initial amount of machine  $k$  in line  $l$  at stage  $s$ .  
 $ku_{ls}$  = maximum number of machines in line  $l$  at stage  $s$ .  
 $ks_{ijsk}$  = required work hours of machine  $k$  used at stage  $s$  for manufacturing a unit of product  $i$  with resource configuration  $j$ .  
 $ka_{sk}$  = available work hours of machine  $k$  at stage  $s$ .  
 $kb_{ll's}$  = machine migration capability from line  $l$  to  $l'$  at stage  $s$ .  
 $nl_{lsn}$  = initial amount of tool  $n$  in line  $l$  at stage  $s$ .  
 $nu_{ls}$  = maximum number of tools in line  $l$  at stage  $s$ .  
 $ns_{ijsn}$  = required work hours of tool  $n$  used at stage  $s$  for manufacturing a unit of product  $i$  with resource configuration  $j$ .  
 $na_{sn}$  = available work hours of tool  $n$  at stage  $s$ .  
 $nb_{ll's}$  = tool migration capability from line  $l$  to  $l'$  at stage  $s$ .  
 $mq_{smt}$  = total available quantity of material  $m$  at stage  $s$  in time  $t$ .  
 $ms_{ijsm}$  = consumption ratio of material  $m$  for manufacturing a unit of product  $i$  at stage  $s$  with resource configuration  $j$ .  
 $tf_{ijs}$  = production capability of product  $i$  at stage  $s$  with resource configuration  $j$ .  
 $tb_{lsl'(s+1)t}$  = transportation capability from line  $l$  at stage  $s$  to line  $l'$  at stage  $s+1$ .  
 $vc_{iljs}$  = production cost for manufacturing a unit of product  $i$  in line  $l$  at stage  $s$  with resource configuration  $j$ .  
 $kc_s$  = machine migration cost at stage  $s$ .  
 $nc_s$  = tool migration cost at stage  $s$ .

### 3. Decision variables

- $KQ_{lskt}$  = the number of machine  $k$  for line  $l$  at stage  $s$  in time  $t$ .  
 $KM_{ll'skt}$  = the migration number of machine  $k$  from line  $l$  to line  $l'$  at stage  $s$  in time  $t$ .  
 $NQ_{lsnt}$  = the number of tool  $n$  for line  $l$  at stage  $s$  in time  $t$ .  
 $NM_{ll'snt}$  = the migration number of tool  $n$  from line  $l$  to line  $l'$  at stage  $s$  in time  $t$ .  
 $XQ_{iljst}$  = production amounts of product  $i$  with resource configuration  $j$  for line  $l$  at stage  $s$  in time  $t$ .  
 $RQ_{iljstl'(s+1)t}$  = transportation amounts of product  $i$  from line  $l$  with resource configuration  $j$  at stage  $s$  to line  $l'$  with resource configuration  $j'$  at stage  $(s+1)$  in time  $t$ .  
 $SQ_{ict}$  = sales amounts of product  $i$  for customer  $c$  in time  $t$ .  
 $SL_c$  = service level for customer  $c$ .

### 4. Objective Function

$$\begin{aligned}
 & \text{Maximize} \\
 & \sum_i \sum_c \sum_t (pr_{ict} \times SQ_{ict}) - \sum_i \sum_l \sum_j \sum_s \sum_t (vc_{iljs} \times XQ_{iljst}) \\
 & - \sum_l \sum_{l'} \sum_s \sum_k \sum_t (kc_s \times KM_{ll'skt}) - \sum_l \sum_{l'} \sum_s \sum_n \sum_t (nc_s \times NM_{ll'snt})
 \end{aligned} \tag{1}$$

It aims to obtain the optimal capacity planning decision to seek the maximization of net profit.

### 5. Constraints

- Machine migration balance constraints

$$KQ_{lsk0} = kl_{lsk} \quad \forall l, s, k. \quad (2)$$

$$KQ_{lskt} = KQ_{lsk(t-1)} - \sum_{l'} KM_{ll'skt} + \sum_{l'} KM_{l'l'skt} \quad \forall l, s, k, t. \quad (3)$$

$$KQ_{lskt} \leq ku_{ls} \quad \forall l, s, k, t. \quad (4)$$

$$KM_{ll'skt} \leq M \times kb_{ll's} \quad \forall l, l', s, k, t. \quad (5)$$

- Tool migration balance constraints

$$NQ_{lsn0} = nl_{lsn} \quad \forall l, s, n. \quad (6)$$

$$NQ_{lsnt} = NQ_{lsn(t-1)} - \sum_{l'} NM_{ll'snt} + \sum_{l'} NM_{l'l'snt} \quad \forall l, s, n, t. \quad (7)$$

$$NQ_{lsnt} \leq nu_{ls} \quad \forall l, s, n, t. \quad (8)$$

$$NM_{ll'snt} \leq M \times nb_{ll's} \quad \forall l, l', s, n, t. \quad (9)$$

- Production and transportation balance constraints

$$XQ_{iljst} = \sum_{l'} \sum_{j'} RQ_{iljst'l'(s+1)t} \quad \forall i, l, j, s = 1, \dots, S-1, t. \quad (10)$$

$$\sum_{l'} \sum_{j'} RQ_{iljst'l'(s-1)l'st} = XQ_{iljst} \quad \forall i, l, j, s = 2, \dots, S, t. \quad (11)$$

- Capacity constraints

$$\sum_i \sum_j (XQ_{iljst} \times ks_{ijsk}) \leq KQ_{lskt} \times ka_{sk} \quad \forall l, s, k, t. \quad (12)$$

$$\sum_i \sum_j (XQ_{iljst} \times ns_{ijsn}) \leq NQ_{lsnt} \times na_{sn} \quad \forall l, s, n, t. \quad (13)$$

- Material constraint

$$\sum_i \sum_l \sum_j (XQ_{iljst} \times ms_{ijsm}) \leq mq_{smt} \quad \forall s, m, t. \quad (14)$$

- Production capability constraint

$$XQ_{iljst} \leq M \times tf_{ijs} \quad \forall i, l, j, s, t. \quad (15)$$

- Transportation capability constraint

$$RQ_{iljst'l'(s+1)t} \leq M \times tb_{l'l'(s+1)} \quad \forall i, l, j, s, l', j', t. \quad (16)$$

- Demand fulfillment constraints

$$\sum_l \sum_j XQ_{iljst} = SQ_{ict} \quad \forall i, s = S, c, t. \quad (17)$$

$$SQ_{ict} \leq de_{ict} \quad \forall i, c, t. \quad (18)$$

- Service level

$$SL_c = \left[ \frac{\sum_i SQ_{ict}}{\sum_i de_{ict}} \right] \quad \forall c, t. \quad (19)$$

- Domain restriction for decision variables

$$KQ_{lskt}, KM_{ll'skt}, NQ_{lsnt}, NM_{ll'snt} \in \text{integer} \quad \forall l, s, k, n, t. \quad (20)$$

$$XQ_{iljst}, RQ_{iljst'l'(s+1)t}, SQ_{ict}, SL_c \geq 0 \quad \forall i, l, l', j, j', s, t, c. \quad (21)$$

## Appendix B: Input information

Table B.1~Table B.22 show the related information for the large-scale semiconductor packaging and testing factory case required in this paper.

Table B.1 Index information

|               |          |          |    |    |    |    |    |    |
|---------------|----------|----------|----|----|----|----|----|----|
| Customer      | c1       | c2       | c3 |    |    |    |    |    |
| Product       | i1       | i2       | i3 | i4 | i5 | i6 | i7 | i8 |
| Line          | $\ell 1$ | $\ell 2$ |    |    |    |    |    |    |
| Stage         | DB       | WB       | MD |    |    |    |    |    |
| Scenario      | r1       | r2       | r3 |    |    |    |    |    |
| Material      | m1       | m2       | m3 | m4 |    |    |    |    |
| Machine       | k1       | k2       | k3 |    |    |    |    |    |
| Tool          | n1       | n2       | n3 | n4 |    |    |    |    |
| Period        | 1        | 2        | 3  | 4  |    |    |    |    |
| Configuration | DB       | j1       | j2 | j3 |    |    |    |    |
|               | WB       | j1       | j2 | j3 |    |    |    |    |
|               | MD       | j1       | j2 | j3 | j4 | j5 | j6 | j7 |

Table B.2 Resource configuration

|        |                   |                   |                   |                   |                   |                   |                   |
|--------|-------------------|-------------------|-------------------|-------------------|-------------------|-------------------|-------------------|
| DB(s1) | $j_1=k_1$         | $j_2=k_2$         | $j_3=k_3$         |                   |                   |                   |                   |
| WB(s2) | $j_1=k_1$         | $j_2=k_2$         | $j_3=k_3$         |                   |                   |                   |                   |
| MD(s3) | $j_1=k_1+n_1+m_4$ | $j_2=k_1+n_2+m_1$ | $j_3=k_1+n_3+m_2$ | $j_4=k_2+n_3+m_4$ | $j_5=k_2+n_4+m_4$ | $j_6=k_3+n_1+m_4$ | $j_7=k_3+n_4+m_2$ |

## 1. Demand-related parameters

Table B.3 shows customer demands for all products under each scenario. This case covers four time periods. Table B.4 shows sales prices of products. Table B.5 shows the occurring probability of all scenarios.

Table B.3 Customer demands for all products under each scenario

| Scenario | Customer | Product | Period (month) |         |        |        |
|----------|----------|---------|----------------|---------|--------|--------|
|          |          |         | 1              | 2       | 3      | 4      |
| r1       | c1       | i1      | 45,955         | 80,375  | 22,548 | 37,665 |
|          |          | i2      | 137,865        | 40,187  | 72,153 | 0      |
|          |          | i3      | 137,865        | 40,187  | 0      | 75,331 |
|          | c2       | i4      | 91,910         | 60,281  | 54,115 | 0      |
|          |          | i5      | 22,977         | 120,562 | 45,096 | 15,066 |

|    |    |    |         |         |         |         |
|----|----|----|---------|---------|---------|---------|
|    |    | i6 | 110,292 | 58,606  | 4,509   | 41,432  |
|    | c3 | i7 | 53,614  | 24,112  | 54,115  | 33,899  |
|    |    | i8 | 225,946 | 21,768  | 0       | 11,299  |
|    |    | i1 | 48,000  | 96,000  | 30,000  | 60,000  |
|    | c1 | i2 | 144,000 | 48,000  | 96,000  | 0       |
|    |    | i3 | 144,000 | 48,000  | 0       | 120,000 |
| r2 | c2 | i4 | 96,000  | 72,000  | 72,000  | 0       |
|    |    | i5 | 24,000  | 144,000 | 60,000  | 24,000  |
|    |    | i6 | 115,200 | 70,000  | 6,000   | 66,000  |
|    | c3 | i7 | 56,000  | 28,800  | 72,000  | 54,000  |
|    |    | i8 | 236,000 | 26,000  | 0       | 18,000  |
|    |    | i1 | 50,044  | 111,624 | 37,451  | 82334   |
|    | c1 | i2 | 150,134 | 55,812  | 119,846 | 0       |
|    |    | i3 | 150,134 | 55,812  | 0       | 164668  |
| r3 | c2 | i4 | 100,089 | 83,718  | 89,884  | 0       |
|    |    | i5 | 25,022  | 167,437 | 74,903  | 32933   |
|    |    | i6 | 120,107 | 81,393  | 7,490   | 90567   |
|    | c3 | i7 | 58,385  | 33,487  | 89,884  | 74100   |
|    |    | i8 | 246,053 | 30,231  | 0       | 24700   |

Table B.4 Sales prices of products

| Products     | i1 | i2 | i3 | i4 | i5  | i6 | i7 | i8 |
|--------------|----|----|----|----|-----|----|----|----|
| Sales prices | 20 | 30 | 20 | 25 | 100 | 50 | 60 | 70 |

Table B.5 Occurring probability of all scenarios

| Scenarios | Probability |
|-----------|-------------|
| r1        | 1/3         |
| r2        | 1/3         |
| r3        | 1/3         |

2. Machine-related parameters

There is an initial machine allocation in each line at each stage, as shown in Table B.6; Table B.7 indicates that there is the upper limit of machine allocation in each line at each stage; Required work hours of machines for manufacturing a unit of product is presented in Table B.8; Production capacity of each machine (machine hour) at each production stage is shown in Table B.9. Machine migration capability between different lines at each stage is shown in Table B.10, which is a binary parameter. Below, 1 means that they can be moved between lines; 0 means that they cannot be moved.

Table B.6 Initial machine allocation in each line at each stage

| Lines    | Production stages | Types of machine |    |    |
|----------|-------------------|------------------|----|----|
|          |                   | k1               | k2 | k3 |
| $\ell_1$ | DB                | 10               | 15 | 0  |
|          | WB                | 5                | 6  | 0  |
|          | MD                | 10               | 10 | 0  |
| $\ell_2$ | DB                | 0                | 5  | 6  |
|          | WB                | 0                | 10 | 9  |
|          | MD                | 0                | 8  | 6  |

Table B.7 Upper limit of machine allocation in each line at each stage

| Production line | Production stage |    |    |
|-----------------|------------------|----|----|
|                 | DB               | WB | MD |
| $\ell_1$        | 17               | 7  | 11 |
| $\ell_2$        | 8                | 12 | 10 |

Table B.8 Work hours of machines for producing a unit of product at all stages under all kinds of configurations

| Product | Resource configuration | Production stage (s) | Type of machine | $ks_{ijsk}$ | Product | Resource configuration | Production stage (s) | Type of machine | $ks_{ijsk}$ |
|---------|------------------------|----------------------|-----------------|-------------|---------|------------------------|----------------------|-----------------|-------------|
| i1      | j1                     | DB                   | k1              | 10          | i5      | j1                     | MD                   | k1              | 20          |
| i1      | j1                     | WB                   | k1              | 30          | i5      | j3                     | DB                   | k3              | 12          |
| i1      | j1                     | MD                   | k1              | 10          | i5      | j3                     | WB                   | k3              | 30          |
| i1      | j2                     | DB                   | k2              | 8           | i5      | j7                     | MD                   | k3              | 10          |
| i1      | j2                     | MD                   | k1              | 5           | i6      | j2                     | WB                   | k2              | 25          |
| i2      | j1                     | WB                   | k1              | 35          | i6      | j3                     | DB                   | k3              | 7           |
| i2      | j2                     | DB                   | k2              | 11          | i6      | j3                     | WB                   | k3              | 20          |

|    |    |    |    |    |    |    |    |    |    |
|----|----|----|----|----|----|----|----|----|----|
| i2 | j2 | WB | k2 | 25 | i6 | j4 | MD | k2 | 25 |
| i2 | j2 | MD | k1 | 15 | i6 | j7 | MD | k3 | 15 |
| i2 | j3 | DB | k3 | 7  | i7 | j2 | DB | k2 | 12 |
| i2 | j3 | MD | k1 | 10 | i7 | j3 | WB | k3 | 35 |
| i3 | j1 | DB | k1 | 12 | i7 | j6 | MD | k3 | 33 |
| i3 | j1 | MD | k1 | 12 | i8 | j1 | DB | k1 | 15 |
| i3 | j2 | WB | k2 | 40 | i8 | j1 | WB | k1 | 40 |
| i4 | j2 | DB | k2 | 9  | i8 | j2 | WB | k2 | 30 |
| i4 | j3 | WB | k3 | 20 | i8 | j3 | DB | k3 | 10 |
| i4 | j3 | MD | k1 | 10 | i8 | j3 | MD | k3 | 40 |
| i5 | j1 | DB | k1 | 15 | i8 | j5 | MD | k2 | 25 |
| i5 | j1 | WB | k1 | 40 |    |    |    |    |    |

Table B.9 Production capacity of each machine (machine hour) at each production stage  
Type of machine

| Production stage | Type of machine |           |           |
|------------------|-----------------|-----------|-----------|
|                  | k1              | k2        | k3        |
| DB               | 4,320,000       | 2,160,000 | 4,320,000 |
| WB               | 8,640,000       | 6,912,000 | 7,776,000 |
| MD               | 2,592,000       | 3,888,000 | 2,592,000 |

Table B.10 Machine migration capability between different lines at each stage

| Lines    | Move to line | Production stages |    |    |
|----------|--------------|-------------------|----|----|
|          |              | DB                | WB | MD |
| $\ell_1$ | $\ell_2$     | 0                 | 1  | 1  |
| $\ell_2$ | $\ell_1$     | 0                 | 1  | 1  |

### 3. Tool-related parameters

The MD stage has an initial tool allocation in each line, as shown in Table B.11; Table B.12 indicates that there is the upper limit of tool allocation in each line; Required work hours of tools for manufacturing a unit of product under all kinds of configurations is presented in Table B.13. Production capacity of each tool (tool hour) is shown in

Table B.14. Tool migration capability between different lines is shown in Table B.15, which is a binary parameter. Below, 1 means that they can be moved between lines; 0 means that they cannot be moved.

Table B.11 Initial tool allocation in each line at MD stage

| Lines    | Production stage | Type of tool |    |    |    |
|----------|------------------|--------------|----|----|----|
|          |                  | n1           | n2 | n3 | n4 |
| $\ell_1$ | MD               | 0            | 30 | 0  | 30 |
| $\ell_2$ | MD               | 30           | 0  | 20 | 0  |

Table B.12 Upper limit of tool allocation in each line at MD stage

| Lines    | Upper limit of tool allocation |
|----------|--------------------------------|
| $\ell_1$ | 70                             |
| $\ell_2$ | 80                             |

Table B.13 Work hours of tools for producing a unit of product at MD stage under all kinds of configurations

| Product (i) | Resource configuration (j) | Production stages (s) | Type of tool (n) | $ns_{ijsn}$ |
|-------------|----------------------------|-----------------------|------------------|-------------|
| i1          | j1                         | MD                    | n1               | 10          |
| i1          | j2                         | MD                    | n2               | 5           |
| i2          | j2                         | MD                    | n2               | 15          |
| i2          | j3                         | MD                    | n3               | 10          |
| i3          | j1                         | MD                    | n1               | 12          |
| i4          | j3                         | MD                    | n3               | 10          |
| i5          | j1                         | MD                    | n1               | 20          |
| i5          | j7                         | MD                    | n4               | 10          |
| i6          | j4                         | MD                    | n3               | 25          |
| i6          | j7                         | MD                    | n4               | 15          |
| i7          | j6                         | MD                    | n1               | 20          |
| i8          | j3                         | MD                    | n3               | 40          |
| i8          | j5                         | MD                    | n4               | 25          |

Table B.14 Production capacity of each tool (tool hour) at MD stage

Type of tool

| Production stage | n1         | n2         | n3        | n4         |
|------------------|------------|------------|-----------|------------|
| MD               | 12,960,000 | 12,960,000 | 8,640,000 | 12,960,000 |

Table B.15 Tool migration capability between different lines at MD stage

| Lines    | Move to line | Production stages |
|----------|--------------|-------------------|
|          |              | MD                |
| $\ell 1$ | $\ell 2$     | 1                 |
| $\ell 2$ | $\ell 1$     | 1                 |

4. Material related parameters

Table B.16 shows the material available amount at all production stages. Table B.17 indicates material consumption ratio for manufacturing a unit of product at production stages under resource configurations.

Table B.16 Material available amount at MD stage

| Production stage | Category of material | Period (month) |           |           |           |
|------------------|----------------------|----------------|-----------|-----------|-----------|
|                  |                      | 1              | 2         | 3         | 4         |
| MD               | m1                   | 7,000,000      | 6,000,000 | 7,000,000 | 6,000,000 |
|                  | m2                   | 1,000,000      | 8,000,000 | 1,000,000 | 8,000,000 |
|                  | m3                   | 6,000,000      | 100,000   | 6,000,000 | 100,000   |
|                  | m4                   | 7,000,000      | 4,000,000 | 7,000,000 | 4,000,000 |

Table B.17 Material consumption ratio for manufacturing a unit of product

| Product (i) | Resource configuration (j) | Production stage (s) | Category of material (m) | $ms_{ijsm}$ |
|-------------|----------------------------|----------------------|--------------------------|-------------|
| i1          | j1                         | MD                   | m4                       | 1           |
| i1          | j2                         | MD                   | m1                       | 1           |
| i2          | j2                         | MD                   | m1                       | 1           |
| i2          | j3                         | MD                   | m2                       | 1           |
| i3          | j1                         | MD                   | m4                       | 1           |
| i4          | j3                         | MD                   | m2                       | 1           |
| i5          | j7                         | MD                   | m2                       | 1           |
| i6          | j4                         | MD                   | m3                       | 1           |
| i6          | j7                         | MD                   | m2                       | 1           |



|    |    |    |    |   |
|----|----|----|----|---|
| i7 | j6 | MD | m3 | 1 |
| i8 | j3 | MD | m2 | 1 |
| i8 | j5 | MD | m4 | 1 |

5. Production capability related parameters

Production capability for each product at production stages with resource configurations is shown in Table B.18.

Table B.18 Production capability for each product at production stages with resource configurations

| Product | Resource      | Production stage |    |    | Product | Resource      | Production stage |    |    |
|---------|---------------|------------------|----|----|---------|---------------|------------------|----|----|
|         | configuration | DB               | WB | MD |         | configuration | DB               | WB | MD |
| i1      | j1            | 1                | 1  | 1  | i5      | j1            | 1                | 1  | 1  |
|         | j2            | 1                | 0  | 1  |         | j2            | 0                | 0  | 0  |
|         | j3            | 0                | 0  | 0  |         | j3            | 1                | 1  | 0  |
|         | j4            |                  |    | 0  |         | j4            |                  |    | 0  |
|         | j5            |                  |    | 0  |         | j5            |                  |    | 0  |
|         | j6            |                  |    | 0  |         | j6            |                  |    | 0  |
|         | j7            |                  |    | 0  |         | j7            |                  |    | 1  |
| i2      | j1            | 0                | 1  | 0  | i6      | j1            | 0                | 0  | 0  |
|         | j2            | 1                | 1  | 1  |         | j2            | 0                | 1  | 0  |
|         | j3            | 1                | 0  | 1  |         | j3            | 1                | 1  | 0  |
|         | j4            |                  |    | 0  |         | j4            |                  |    | 1  |
|         | j5            |                  |    | 0  |         | j5            |                  |    | 0  |
|         | j6            |                  |    | 0  |         | j6            |                  |    | 0  |
|         | j7            |                  |    | 0  |         | j7            |                  |    | 1  |
| i3      | j1            | 1                | 0  | 1  | i7      | j1            | 0                | 0  | 0  |
|         | j2            | 0                | 1  | 0  |         | j2            | 1                | 0  | 0  |
|         | j3            | 0                | 0  | 0  |         | j3            | 0                | 1  | 0  |

|    |    |   |   |   |    |    |   |   |   |
|----|----|---|---|---|----|----|---|---|---|
|    | j4 |   |   | 0 |    | j4 |   |   | 0 |
|    | j5 |   |   | 0 |    | j5 |   |   | 0 |
|    | j6 |   |   | 0 |    | j6 |   |   | 1 |
|    | j7 |   |   | 0 |    | j7 |   |   | 0 |
|    | j1 | 0 | 0 | 0 |    | j1 | 1 | 1 | 0 |
|    | j2 | 1 | 0 | 0 |    | j2 | 0 | 1 | 0 |
|    | j3 | 0 | 1 | 1 |    | j3 | 1 | 0 | 1 |
| i4 | j4 |   |   | 0 | i8 | j4 |   |   | 0 |
|    | j5 |   |   | 0 |    | j5 |   |   | 1 |
|    | j6 |   |   | 0 |    | j6 |   |   | 0 |
|    | j7 |   |   | 0 |    | j7 |   |   | 0 |

#### 6. Transportation-related parameters

Transportation capability between production stages is shown in Table B.19, which is a binary parameter. Below, 1 means transportation operation is available; 0 means transportation operation is unavailable.

Table B.19 Transportation capability between production stages

| Line     | Pre-production stage | Post-production stage |     |               |     |
|----------|----------------------|-----------------------|-----|---------------|-----|
|          |                      | Line $\ell 1$         |     | Line $\ell 2$ |     |
|          |                      | WB'                   | MD' | WB'           | MD' |
| $\ell 1$ | DB                   | 1                     | 0   | 0             | 0   |
|          | WB                   | 0                     | 1   | 0             | 0   |
| $\ell 2$ | DB                   | 0                     | 0   | 1             | 0   |
|          | WB                   | 0                     | 0   | 0             | 1   |

#### 7. Costs-related parameters

Variable cost for manufacturing a unit of product in lines at production stages with resource configurations is shown in Table B.20. Migration cost for moving machines and tools between lines at each production stage is presented in Table B.21 and Table B.22.

Table B.20 Variable cost for manufacturing a unit of product in lines at production stages with resource configurations

| Product (i) | Line ( $\ell$ ) | Resource configuration (j) | Production stage (s) | $vc_{i\ell js}$ | Product (i) | Line ( $\ell$ ) | Resource configuration (j) | Production stage (s) | $vc_{i\ell js}$ |
|-------------|-----------------|----------------------------|----------------------|-----------------|-------------|-----------------|----------------------------|----------------------|-----------------|
|-------------|-----------------|----------------------------|----------------------|-----------------|-------------|-----------------|----------------------------|----------------------|-----------------|

|    |          |    |    |   |    |          |    |    |    |
|----|----------|----|----|---|----|----------|----|----|----|
| i1 | $\ell 1$ | j1 | MD | 3 | i5 | $\ell 1$ | j7 | MD | 6  |
| i1 | $\ell 1$ | j2 | MD | 2 | i5 | $\ell 2$ | j1 | MD | 8  |
| i1 | $\ell 2$ | j1 | MD | 4 | i5 | $\ell 2$ | j7 | MD | 6  |
| i1 | $\ell 2$ | j2 | MD | 2 | i6 | $\ell 1$ | j4 | MD | 10 |
| i2 | $\ell 1$ | j2 | MD | 5 | i6 | $\ell 1$ | j7 | MD | 8  |
| i2 | $\ell 1$ | j3 | MD | 4 | i6 | $\ell 2$ | j4 | MD | 9  |
| i2 | $\ell 2$ | j2 | MD | 7 | i6 | $\ell 2$ | j7 | MD | 9  |
| i2 | $\ell 2$ | j3 | MD | 4 | i7 | $\ell 2$ | j6 | MD | 9  |
| i3 | $\ell 1$ | j1 | MD | 6 | i8 | $\ell 1$ | j3 | MD | 12 |
| i3 | $\ell 2$ | j1 | MD | 6 | i8 | $\ell 1$ | j5 | MD | 11 |
| i4 | $\ell 1$ | j3 | MD | 5 | i8 | $\ell 2$ | j3 | MD | 12 |
| i4 | $\ell 2$ | j3 | MD | 4 | i8 | $\ell 2$ | j5 | MD | 13 |
| i5 | $\ell 1$ | j1 | MD | 8 |    |          |    |    |    |

Table B.21 Machine migration costs at each production stages

| Stages | Machine migration costs |
|--------|-------------------------|
| DB     | 1,000                   |
| WB     | 500                     |
| MD     | 3,000                   |

Table B.22 Tool migration costs at MD production stage

| Stages | Tool migration costs |
|--------|----------------------|
| MD     | 1,000                |
